# Supplementary material
Source: PubMed Central journal article supplement (PMC9059963)
Supplement: NIHMS1796870-supplement-2.pdf [file NIHMS1796870-supplement-2.pdf]

# Supplemental Figure 1

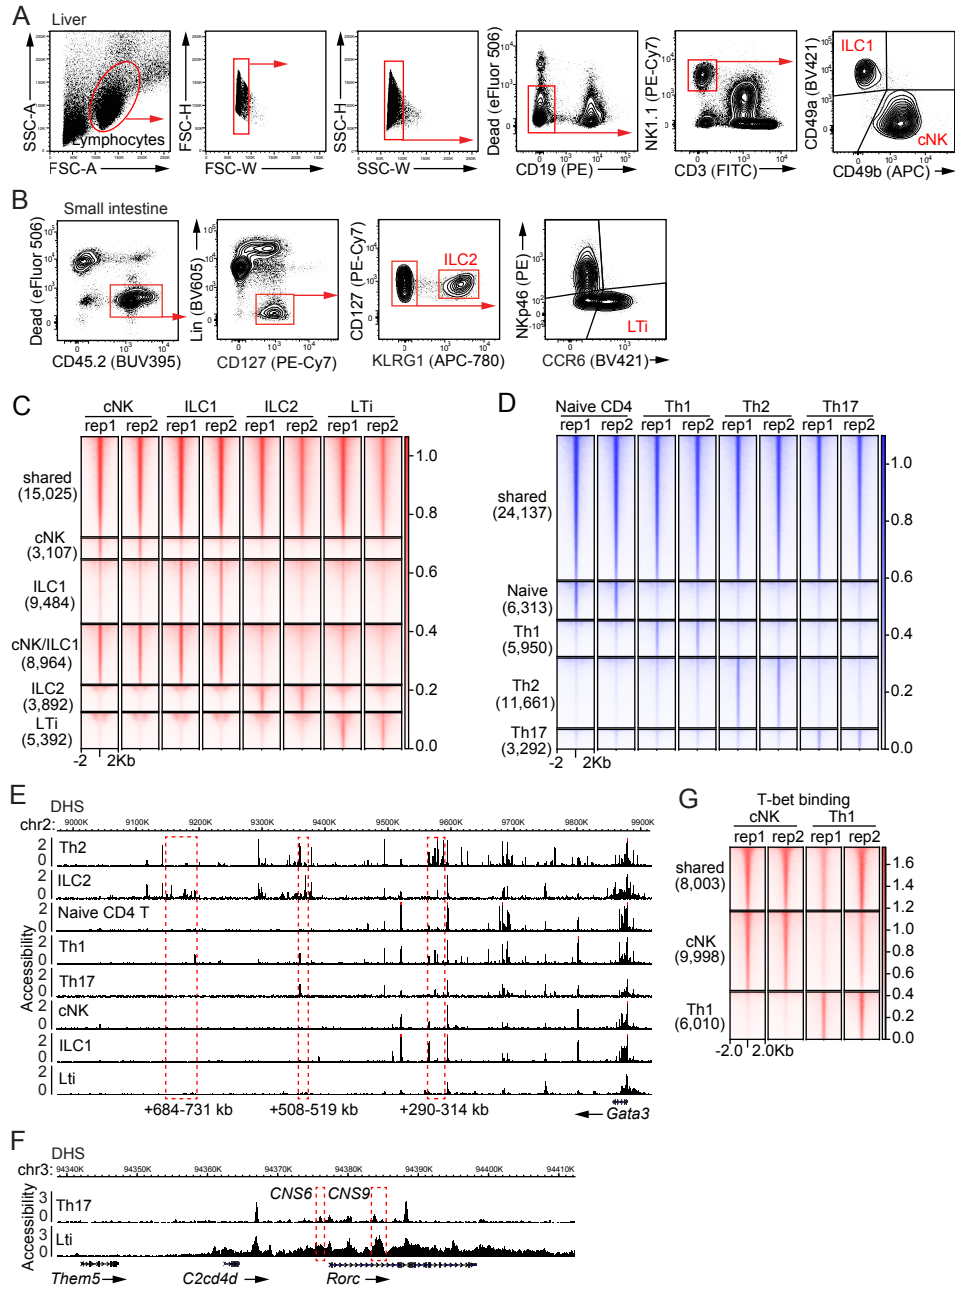

**Supplementary Figure 1. Differential chromatin accessibilities in CD4 T cell and ILC subsets, related to Figure 1**

(A) The hepatic cNK cells were gated as CD3<sup>-</sup>CD19<sup>-</sup>NK1.1<sup>+</sup>CD49a<sup>-</sup>CD49b<sup>+</sup>, and the hepatic ILC1s were gated as CD3<sup>-</sup>CD19<sup>-</sup>NK1.1<sup>+</sup>CD49a<sup>+</sup>CD49b<sup>-</sup>.

(B) The ILC2s were gated as Lin<sup>-</sup>CD127<sup>+</sup>KLRG1<sup>+</sup>, and the LTi cells were gated as Lin<sup>-</sup>CD127<sup>+</sup>KLRG1<sup>-</sup>CCR6<sup>+</sup>NKp46<sup>-</sup> from the small intestine.

(C) cNK<sup>-</sup>, ILC1<sup>-</sup>, cNK/ILC1<sup>-</sup>, ILC2<sup>-</sup> and LTi-specific DHSs as well as DHSs shared by all these cell types were analyzed in the innate lymphocyte counterpart.

(D) Naïve CD4 T cell<sup>-</sup>, Th1<sup>-</sup>, Th2<sup>-</sup> and Th17-specific DHSs as well as DHSs shared by all these cell types were analyzed in CD4 T cell counterpart.

(E) Chromatin accessibility at the *Gata3* locus in CD4 T cell and ILC subsets was viewed by Wash U genome browser.

(F) Chromatin accessibility at the *Rorc* locus in Th17 and LTi cells was viewed by Wash U genome browser. The truncated transcript of *Rorc*, which encodes RORyt, was shown.

(G) T-bet binding sites in Th1 and cNK cells were analyzed.

# Supplemental Figure 2

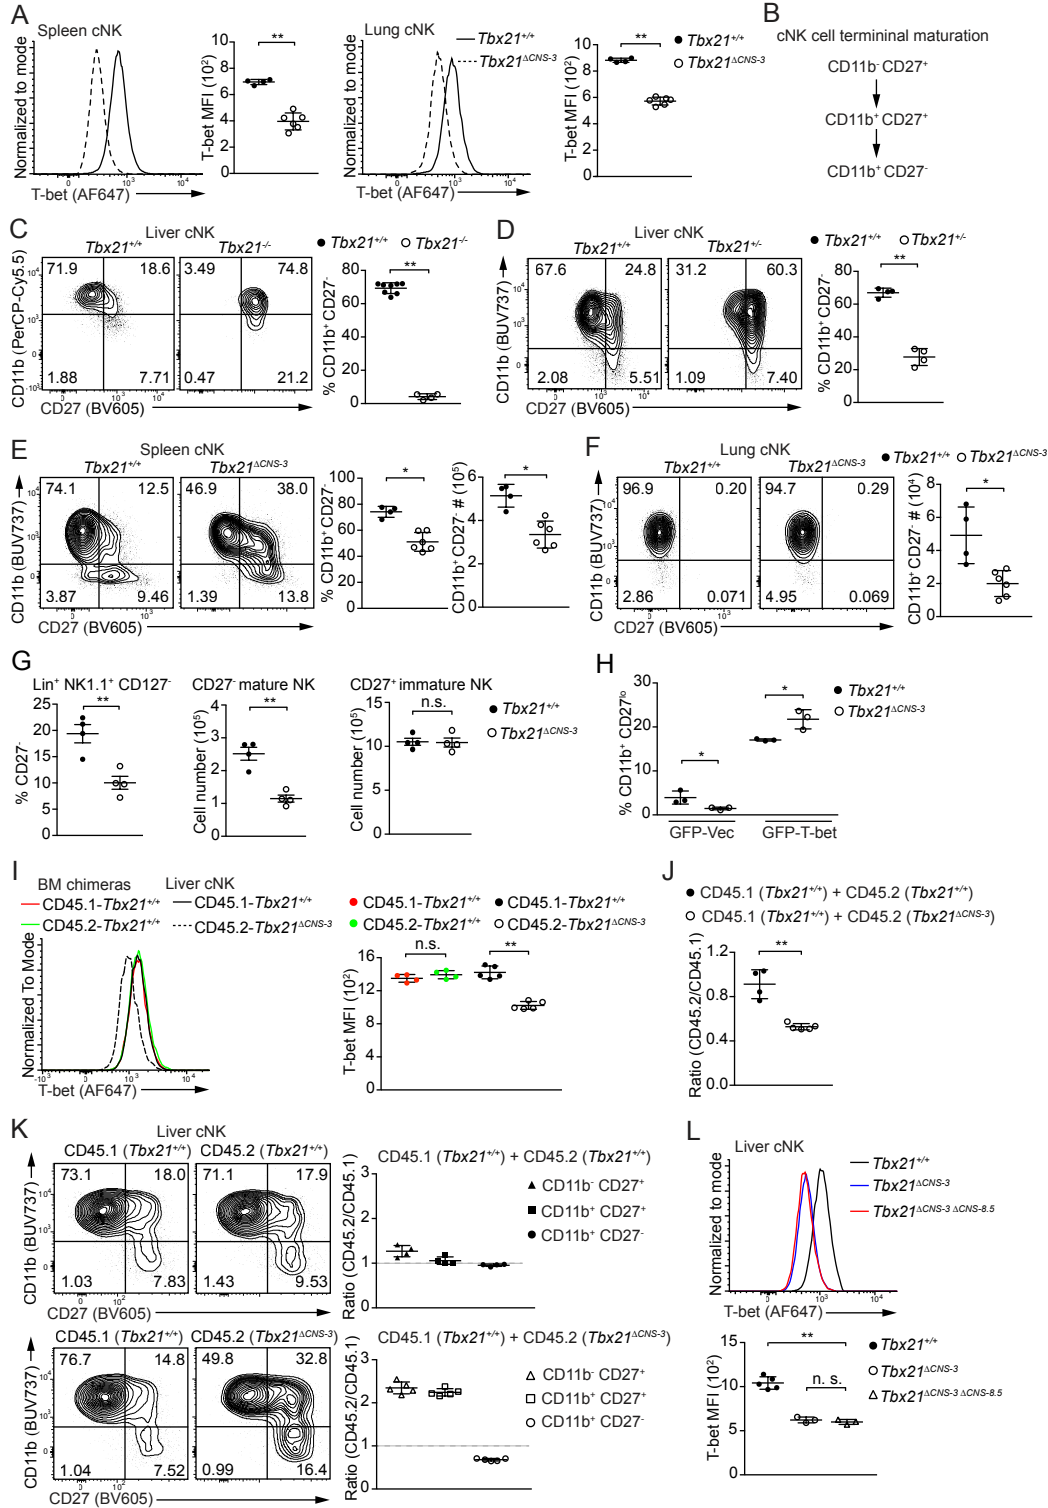

**Supplementary Figure 2. A critical role of *Tbx21-CNS-3* for T-bet induction in cNK cells, related to Figure 2**

(A) T-bet protein amounts in splenic and pulmonic cNK cells from *Tbx21*<sup>+/+</sup> (n=4) and *Tbx21*<sup>ΔCNS-3</sup> (n=6) mice were measured, and T-bet MFI was calculated. Mean ± SD.

(B) Progression of cNK cell maturation using cell surface proteins CD11b and CD27.

(C) Maturation of hepatic cNK cells from *Tbx21*<sup>+/+</sup> (n=8) and *Tbx21*<sup>-/-</sup> (n=4) mice was assessed. The percentage of CD11b<sup>+</sup>CD27<sup>-</sup> mature cNK cells was calculated. Mean ± SD.

(D) Maturation of hepatic cNK cells from *Tbx21*<sup>+/+</sup> (n=4) and *Tbx21*<sup>-/-</sup> (n=4) mice was assessed. The percentage of CD11b<sup>+</sup>CD27<sup>-</sup> mature cNK cells was calculated. Mean ± SD.

(E and F) Maturation of splenic cNK cells (E) and pulmonic cNK cells (F) from *Tbx21*<sup>+/+</sup> (n=4) and *Tbx21*<sup>ΔCNS-3</sup> (n=6) mice was assessed. The percentage and the cell number of CD11b<sup>+</sup>CD27<sup>-</sup> mature cNK cells were calculated. Mean ± SD.

(G) BM cells were stained with a lineage cocktail (CD11b, CD3, CD4, CD8, B220, TER119 and Ly6G/6C) together with antibodies to several surface markers for identifying NK cells. The percentage and total cell number of mature (CD27<sup>-</sup>) and immature (CD27<sup>+</sup>) NK cells within the NK cell (Lin<sup>+</sup>NK1.1<sup>+</sup>CD127<sup>-</sup>) population from *Tbx21*<sup>+/+</sup> (n=4) and *Tbx21*<sup>ΔCNS-3</sup> (n=4) BM were calculated.

(H) LMPPs (Lin<sup>-</sup>CD117<sup>+</sup>Sca1<sup>+</sup>Flt3<sup>+</sup>CD127<sup>-</sup>) from the bone marrow of *Tbx21*<sup>+/+</sup> (n=3) and *Tbx21*<sup>ΔCNS-3</sup> (n=3) mice were cultured 2.5 days before retroviral infection with GFP-T-bet or GFP-Vector control. On day 6, infected cells were further co-cultured with OP9 cell line for additional 8 days. The expression of CD11b and CD27 was assessed on CD19<sup>-</sup>NK1.1<sup>+</sup>GFP<sup>+</sup> populations.

(I-K) CD45.1 *Tbx21*<sup>+/+</sup> BM cells were co-transferred with either CD45.2 *Tbx21*<sup>+/+</sup> BM cells or CD45.2 *Tbx21*<sup>ΔCNS-3</sup> BM cells at 1:1 ratio into sub-lethally irradiated *Rag2*<sup>-/-</sup>*γc*<sup>-/-</sup> recipient mice to create CD45.1 *Tbx21*<sup>+/+</sup>/CD45.2 *Tbx21*<sup>+/+</sup> (n=4) and CD45.1 *Tbx21*<sup>+/+</sup>/CD45.2 *Tbx21*<sup>ΔCNS-3</sup> (n=5) mixed chimeras. T-bet protein amounts were measured, and T-bet MFI was calculated (I); The ratio of total CD45.2 and CD45.1 cNK cells in the same chimeras was calculated (J); The ratio of CD45.2 and CD45.1 CD11b<sup>-</sup>CD27<sup>+</sup>, CD11b<sup>+</sup>CD27<sup>+</sup> and CD11b<sup>+</sup>CD27<sup>-</sup> cells in the same chimeras was calculated (K).

(L) T-bet protein amounts in hepatic cNK cells from *Tbx21*<sup>+/+</sup> (n=5), *Tbx21*<sup>ΔCNS-3</sup> (n=3) and *Tbx21*<sup>ΔCNS-3ΔCNS-8.5</sup> (n=3) mice were measured, and T-bet MFI was calculated. Mean ± SD.

Data are representative of two (A, C-L) independent experiments.

# Supplemental Figure 3

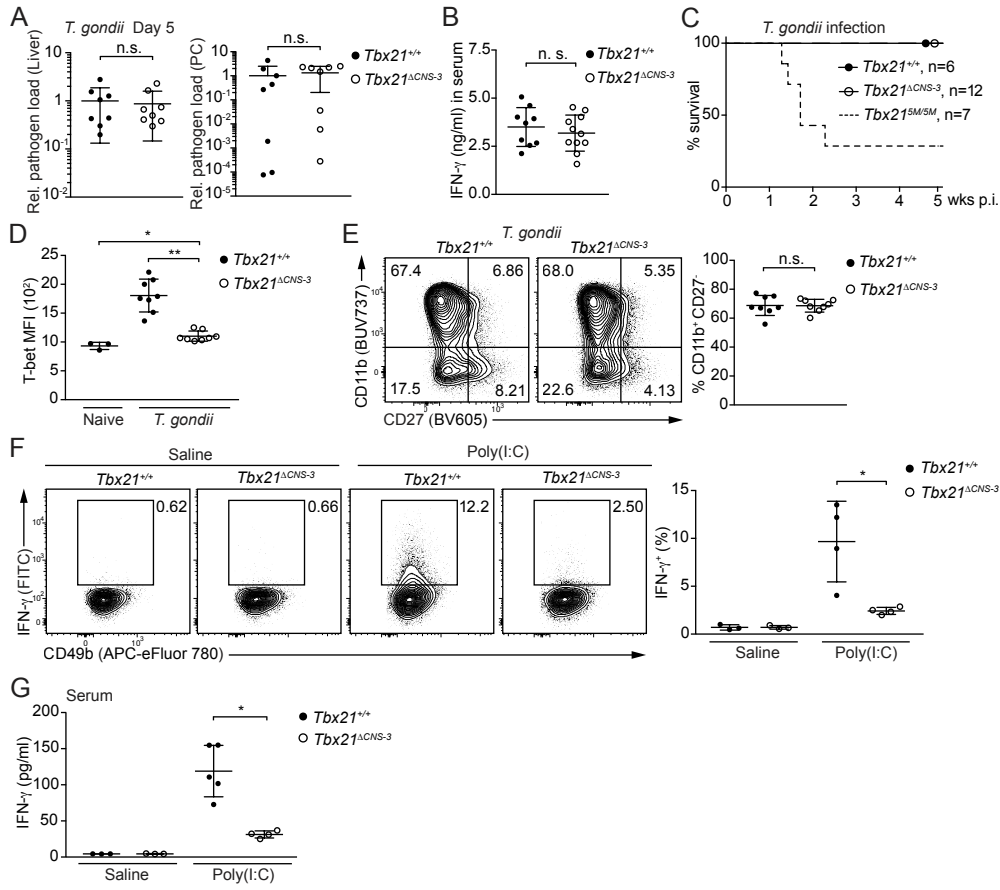

**Supplementary Figure 3. The responses of the *Tbx21*<sup>ΔCNS-3</sup> mice to *T. gondii* infection and poly (I:C) treatment, related to Figure 2 and Figure 4**

(A and B) *Tbx21*<sup>+/+</sup> (n=8) and *Tbx21*<sup>ΔCNS-3</sup> (n=8) mice were infected (*i.p.*) with *T. gondii*. The relative pathogen load in liver and peritoneal cavity (A) and the IFN-γ in the serum (B) were measured after 5 days.

(C) *Tbx21*<sup>+/+</sup> (n=6), *Tbx21*<sup>ΔCNS-3</sup> (n=12) and *Tbx21*<sup>5M/5M</sup> (n=7) mice were infected with *T. gondii*, and then monitored for their survival.

(D and E) T-bet protein amounts in hepatic cNK cells from naïve *Tbx21*<sup>+/+</sup> and *T. gondii* infected *Tbx21*<sup>+/+</sup> and *Tbx21*<sup>ΔCNS-3</sup> mice were measured (D). Maturation of cNK cells from infected mice was assessed (E).

(F) *Tbx21*<sup>+/+</sup> and *Tbx21*<sup>ΔCNS-3</sup> mice were treated (*i.p.*) with poly (I:C) or control saline for 2.5 hours, and the hepatic lymphocytes were harvested and incubated with monensin for 3.5 hours before intracellular staining.

(G) *Tbx21*<sup>+/+</sup> and *Tbx21*<sup>ΔCNS-3</sup> mice were treated (*i.p.*) with poly (I:C) or control saline for 6 hours, and the IFN-γ in the serum was measured by ELISA.

Data are representative of two (A-G) independent experiments.

# Supplemental Figure 4

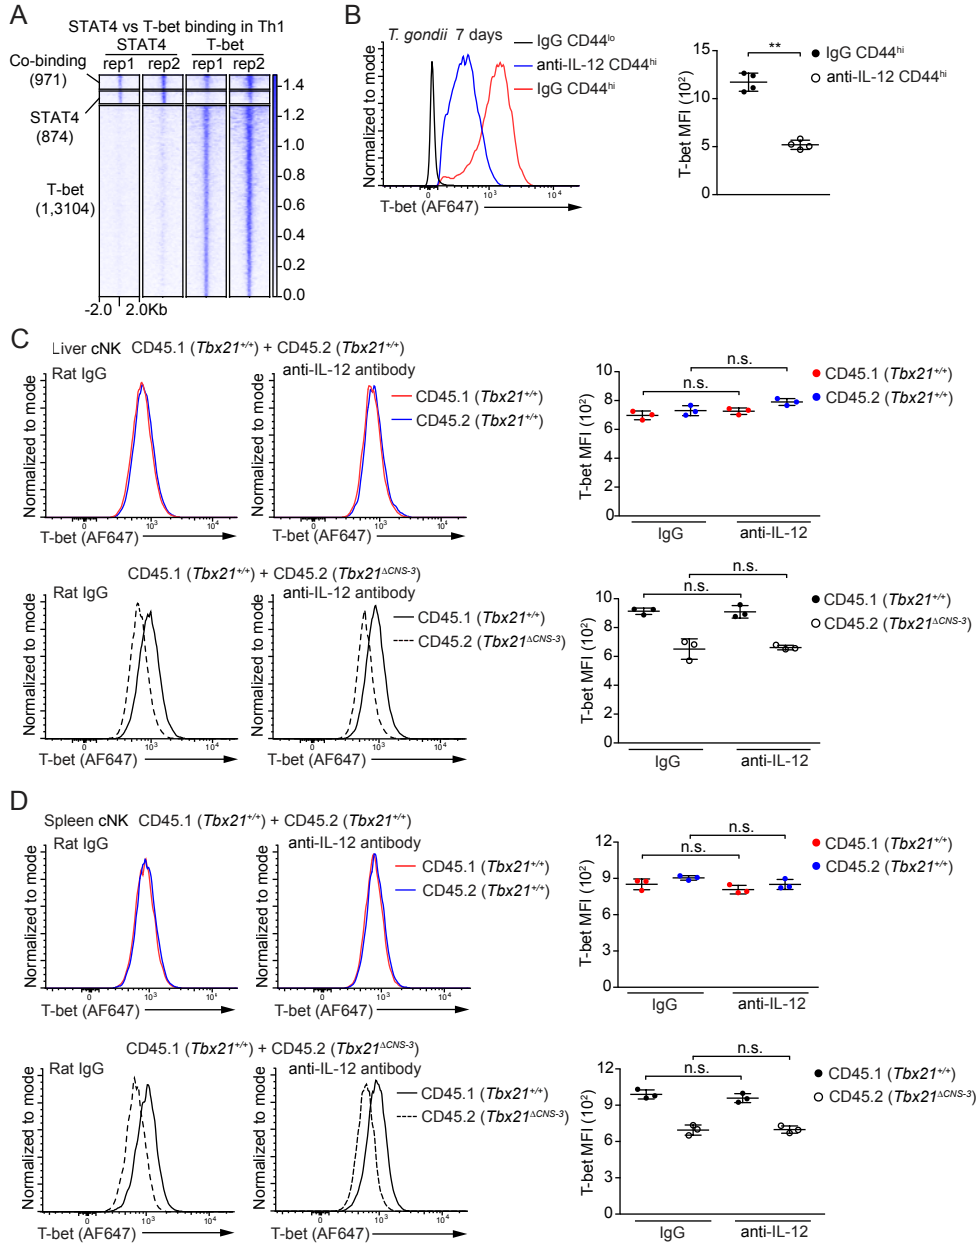

**Supplementary Figure 4. STAT4 binding in Th1 cells and the role of IL-12-STAT4 signaling during cNK cell development, related to Figure 3 and Figure 5**

(A) STAT4 binding sites and T-bet binding sites in Th1 cells were analyzed. Cell samples are in biological duplicates.

(B) WT mice were pre-treated with control IgG or anti-IL-12 p40 2 days before *T. gondii* infection. After infection, the mice were further treated with these antibodies on day 1 and day 4, and then analyzed on day 7. T-bet protein amounts in CD4<sup>+</sup>CD44<sup>hi</sup> and CD4<sup>+</sup>CD44<sup>lo</sup> cells were measured, and T-bet MFI was calculated. Mean  $\pm$  SD, n=4.

(C and D) CD45.1 *Tbx21*<sup>+/+</sup> BM cells were co-transferred with either CD45.2 *Tbx21*<sup>+/+</sup> or CD45.2 *Tbx21* <sup>$\Delta$ CNS-3</sup> BM cells into sub-lethally irradiated *Rag2*<sup>-/-</sup>*γc*<sup>-/-</sup> recipient mice that were pre-treated with control IgG or anti-IL-12 p40 2 days before to create CD45.1 *Tbx21*<sup>+/+</sup>/CD45.2 *Tbx21*<sup>+/+</sup> (n=3) and CD45.1 *Tbx21*<sup>+/+</sup>/CD45.2 *Tbx21* <sup>$\Delta$ CNS-3</sup> (n=3) mixed chimeras. The chimeras were further treated with control IgG or anti-IL-12 p40 every 5 days starting from day 1. T-bet protein amounts in hepatic cNK cells (C) and splenic cNK cells (D) were measured, and T-bet MFI was calculated 8 weeks after BM transplant. Mean  $\pm$  SD.

Data are representative of two (B-D) independent experiments.



# Supplemental Figure 5

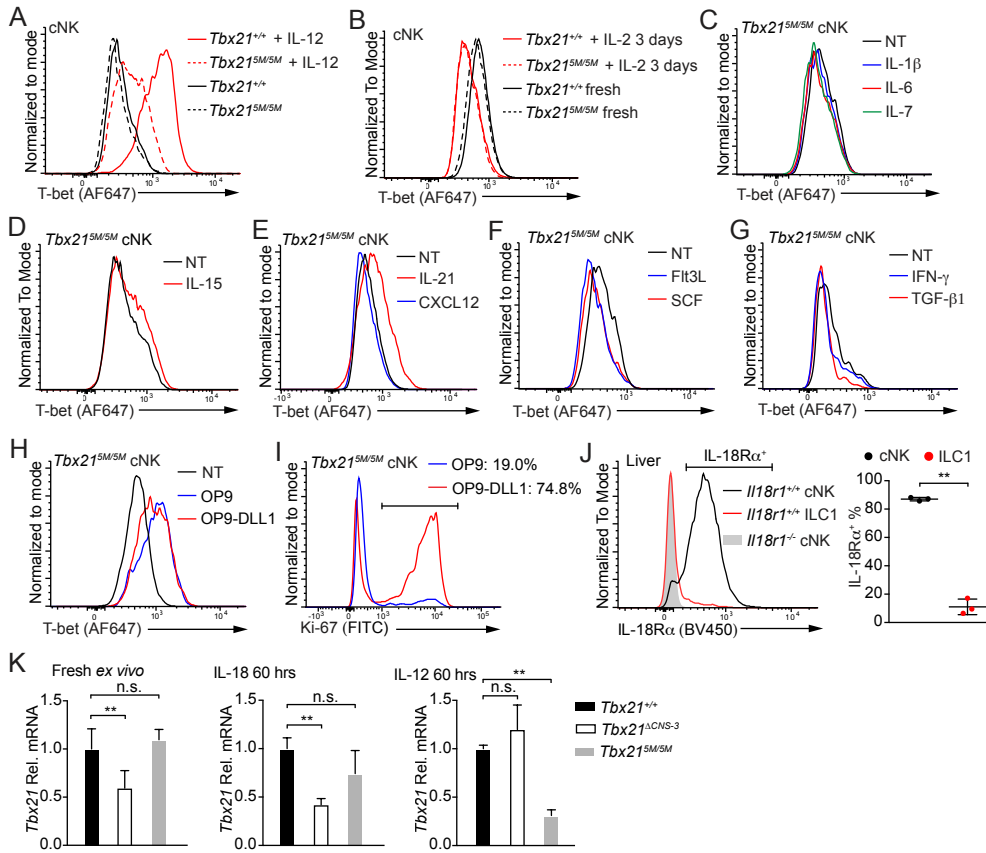

**Supplementary Figure 5. Regulation of T-bet expression in cNK cells *in vitro*, related to Figure 5 and Figure 6**

(A) T-bet protein amounts in *Tbx21*<sup>+/+</sup> and *Tbx21*<sup>5M/5M</sup> cNK cells incubated with or without IL-12 for 3 days in the presence of IL-2 were measured.

(B) T-bet protein amounts in *Tbx21*<sup>+/+</sup> and *Tbx21*<sup>5M/5M</sup> cNK cells freshly harvested (black) and cultured 3 days in the presence of IL-2 *in vitro* (red) were measured.

(C-G) T-bet protein amounts in *Tbx21*<sup>5M/5M</sup> cNK cells incubated with IL-1 $\beta$ , IL-6, IL-7, IL-15, IL-21, CXCL12, Flt3L, SCF, IFN- $\gamma$  or TGF- $\beta$ 1 for 3 days in the presence of IL-2 were measured.

(H and I) *Tbx21*<sup>5M/5M</sup> cNK cells were cultured alone (NT) or co-cultured with OP9 or OP9-DLL1 cell line for 3 days in the presence of IL-2. T-bet and Ki-67 protein amounts were measured.

(J) The expression of IL-18R $\alpha$  on hepatic cNK cells and ILC1s was assessed and the percentage of IL-18R $\alpha$ <sup>+</sup> cells was calculated. Mean  $\pm$  SD, n=3.

(K) T-bet mRNA amounts in *Tbx21*<sup>+/+</sup> (n=3), *Tbx21*<sup>5M/5M</sup> (n=3) and *Tbx21* <sup>$\Delta$ CNS-3</sup> (n=3) splenic cNK cells *ex vivo*, incubated with IL-18 or IL-12 for 60 hours *in vitro* were measured by using qRT-PCR and normalized to *Hprt* mRNA. Mean  $\pm$  SD.

Data are representative of two (A-K) independent experiments.

# Supplemental Figure 6

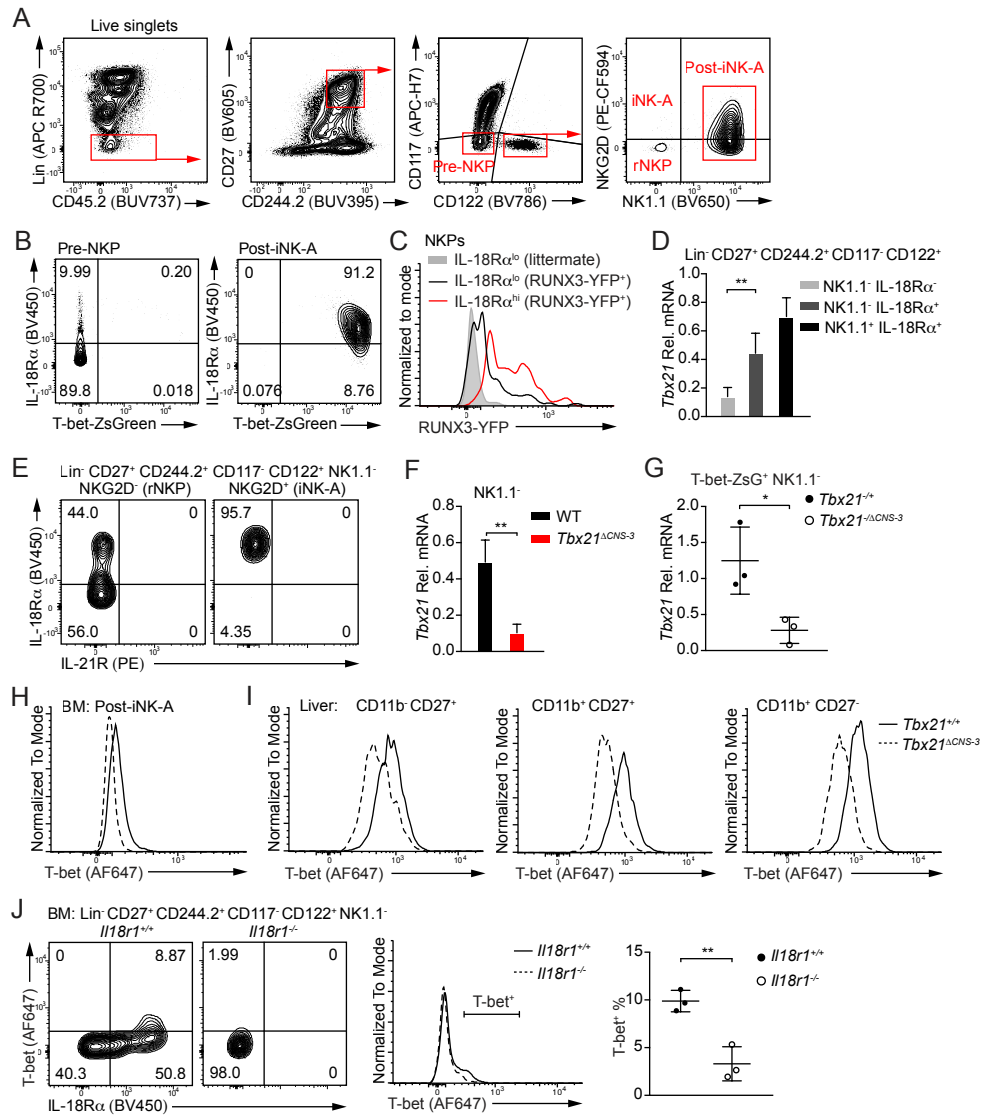

**Supplementary Figure 6. IL-18R $\alpha$  expression is correlated with T-bet expression during NK cell development, related to Figure 6**

(A) Gating strategy for detecting pre-NKPs, rNKPs, iNK-A and post-iNK-A cells in BM. The pre-NKPs were gated as Lin<sup>-</sup>CD27<sup>+</sup>CD244.2<sup>+</sup>CD117<sup>-</sup>CD122<sup>-</sup>, the rNKPs were gated as Lin<sup>-</sup>CD27<sup>+</sup>CD244.2<sup>+</sup>CD117<sup>-</sup>CD122<sup>+</sup>NK1.1<sup>-</sup>NKG2D<sup>-</sup>, the iNK-A cells were gated as Lin<sup>-</sup>CD27<sup>+</sup>CD244.2<sup>+</sup>CD117<sup>-</sup>CD122<sup>+</sup>NK1.1<sup>-</sup>NKG2D<sup>+</sup>, and post-iNK-A cells were gated as Lin<sup>-</sup>CD27<sup>+</sup>CD244.2<sup>+</sup>CD117<sup>-</sup>CD122<sup>+</sup>NK1.1<sup>+</sup>.

(B) The expression of IL-18R $\alpha$  and T-bet reporter ZsGreen in pre-NKPs and post-iNK-A cells from T-bet-ZsGreen reporter mouse was measured.

(C) The expression of RUNX3-YFP reporter in Lin<sup>-</sup>CD27<sup>+</sup>CD244.2<sup>+</sup>CD117<sup>-</sup>CD122<sup>+</sup>NK1.1<sup>-</sup>IL-18R $\alpha$ <sup>lo</sup> and Lin<sup>-</sup>CD27<sup>+</sup>CD244.2<sup>+</sup>CD117<sup>-</sup>CD122<sup>+</sup>NK1.1<sup>-</sup>IL-18R $\alpha$ <sup>hi</sup> cells from RUNX3-YFP<sup>-/+</sup> reporter mice was measured. The Lin<sup>-</sup>CD27<sup>+</sup>CD244.2<sup>+</sup>CD117<sup>-</sup>CD122<sup>+</sup>NK1.1<sup>-</sup>IL-18R $\alpha$ <sup>lo</sup> cells from WT littermate were used as negative controls.

(D) The expression of *Tbx21* mRNA in Lin<sup>-</sup>CD27<sup>+</sup>CD244.2<sup>+</sup>CD117<sup>-</sup>CD122<sup>+</sup>NK1.1<sup>-</sup>IL-18R $\alpha$ <sup>-</sup>, Lin<sup>-</sup>CD27<sup>+</sup>CD244.2<sup>+</sup>CD117<sup>-</sup>CD122<sup>+</sup>NK1.1<sup>-</sup>IL-18R $\alpha$ <sup>+</sup> and Lin<sup>-</sup>CD27<sup>+</sup>CD244.2<sup>+</sup>CD117<sup>-</sup>CD122<sup>+</sup>NK1.1<sup>+</sup>IL-18R $\alpha$ <sup>+</sup> populations was assessed by using qRT-PCR and normalized to *Hprt* mRNA. Mean  $\pm$  SD, n=3.

(E) The expression of IL-21R and IL-18R $\alpha$  in rNKPs and iNK-A cells.

(F) The expression of *Tbx21* mRNA in Lin<sup>-</sup>CD27<sup>+</sup>CD244.2<sup>+</sup>CD117<sup>-</sup>CD122<sup>+</sup>NK1.1<sup>-</sup> cells from *Tbx21*<sup>+/+</sup> (n=3) and *Tbx21* <sup>$\Delta$ CNS-3</sup> (n=3) mice was assessed by using qRT-PCR and normalized to *Hprt* mRNA. Mean  $\pm$  SD.

(G) T-bet-ZsGreen-*Tbx21*<sup>-/-</sup> mice were crossed with *Tbx21*<sup>+/+</sup> or *Tbx21* <sup>$\Delta$ CNS-3</sup> mice to obtain the T-bet-ZsGreen-*Tbx21*<sup>-/+</sup> (one allele is *Tbx21* KO and the other allele is *Tbx21* WT) and T-bet-ZsGreen-*Tbx21*<sup>-/ $\Delta$ CNS-3</sup> (one allele is *Tbx21* KO and the other allele is *Tbx21*-CNS-3 KO) mice. The expression of *Tbx21* mRNA in Lin<sup>-</sup>CD27<sup>+</sup>CD244.2<sup>+</sup>CD117<sup>-</sup>CD122<sup>+</sup>NK1.1<sup>-</sup>ZsGreen<sup>hi</sup> cells from T-bet-ZsGreen-*Tbx21*<sup>-/+</sup> (n=3) and T-bet-ZsGreen-*Tbx21*<sup>-/ $\Delta$ CNS-3</sup> (n=3) mice was assessed by using qRT-PCR and normalized to *Hprt* mRNA. The assay detected the *Tbx21* transcripts from the WT and *Tbx21*-CNS-3 KO alleles. Mean  $\pm$  SD.

(H and I) The expression of T-bet in post-iNK-A cells (H), and hepatic CD11b<sup>-</sup>CD27<sup>+</sup>, CD11b<sup>+</sup>CD27<sup>+</sup> and CD11b<sup>+</sup>CD27<sup>-</sup> cells (I) from *Tbx21*<sup>+/+</sup> (n=3) and *Tbx21* <sup>$\Delta$ CNS-3</sup> (n=3) mice was measured.

(J) The expression of T-bet in the bulk of rNKPs and iNK-A cells from *Il18r1*<sup>+/+</sup> (n=3) and *Il18r1*<sup>-/-</sup> (n=3) BM was measured by intracellular staining. The percentage of T-bet<sup>+</sup> cells in the bulk population was calculated. Mean  $\pm$  SD.

Data are representative of two (B-J) independent experiments.

# Supplemental Figure 7

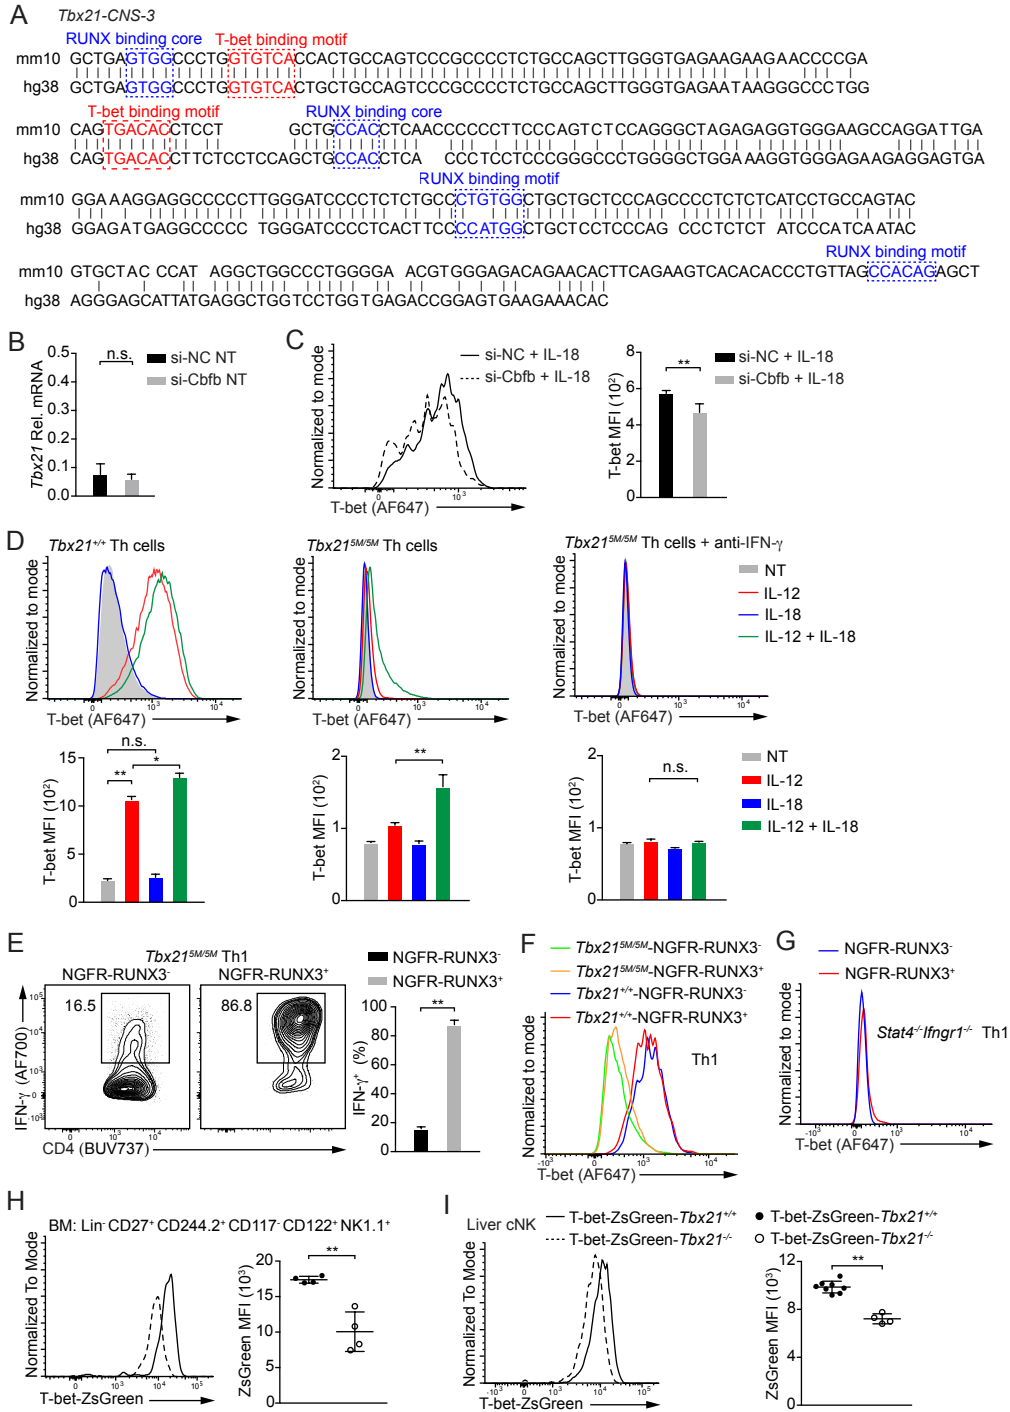

**Supplementary Figure 7. Roles of RUNX3 and T-bet for T-bet induction in Th1 and cNK cells, related to Figure 7**

(A) T-bet binding motifs (red) and RUNX binding motifs (blue) at *Tbx21-CNS-3* were identified by using the MEME Suite and were highlighted. Two core sequences of RUNX binding (blue) near the T-bet binding motifs were also highlighted. The conservation between human *TBX21-CNS-2.5* and mouse *Tbx21-CNS-3* was shown.

(B) *Tbx21<sup>5M/5M</sup>* cNK cells were manipulated as Figure 7D without IL-18 incubation. The transcripts of *Tbx21* were assessed by qRT-PCR. Mean  $\pm$  SD, n=3.

(C) *Tbx21<sup>5M/5M</sup>* cNK cells were manipulated as Figure 7D except that the cells were incubated with IL-18 for 3 days. T-bet protein amounts were measured, and T-bet MFI was calculated. Mean  $\pm$  SD, n=3.

(D) Naïve CD4 T cells from the *Tbx21<sup>+/+</sup>* (n=3) and *Tbx21<sup>5M/5M</sup>* (n=3) mice were cultured with anti-CD3/CD28, IL-2 and anti-IL-4 in the presence of IL-12 or IL-18 alone or in combination for 3 days and then in the resting conditions for 1 day. T-bet protein amounts were measured, and T-bet MFI was calculated. Mean  $\pm$  SD.

(E) Naïve CD4 T cells from the *Tbx21<sup>5M/5M</sup>* mice were cultured under Th1-skewing conditions and infected with NGFR-RUNX3 retrovirus for 4 days. In the presence of monensin, cells were stimulated with PMA and ionomycin for 4 hours. The percentage of IFN- $\gamma$ -producing cells in NGFR<sup>-</sup> and NGFR<sup>+</sup> population was calculated. Mean  $\pm$  SD, n = 3.

(F and G) Naïve CD4 T cells from *Tbx21<sup>+/+</sup>* and *Tbx21<sup>5M/5M</sup>* (F) or *Stat4<sup>-/-</sup>Ifngr1<sup>-/-</sup>* mice (G) were cultured under Th1-skewing conditions and infected with NGFR-RUNX3 retrovirus for 4 days. T-bet protein amounts were measured.

(H) The expression of T-bet-ZsGreen reporter in post-iNK-A cells from T-bet-ZsGreen-*Tbx21<sup>+/+</sup>* (n=4) and T-bet-ZsGreen-*Tbx21<sup>-/-</sup>* (n=4) mice was measured, and ZsGreen MFI was calculated. Mean  $\pm$  SD.

(I) The expression of T-bet-ZsGreen reporter in hepatic cNK cells from T-bet-ZsGreen-*Tbx21<sup>+/+</sup>* (n=8) and T-bet-ZsGreen-*Tbx21<sup>-/-</sup>* (n=4) mice was measured, and ZsGreen MFI was calculated. Mean  $\pm$  SD.

Data are representative of two (B-I) independent experiments.
